# Supplementary material for: Clinicopathologic Characterization of Prostatic Cancer in Dogs
Source: MDPI journal article supplement (doi:10.3390/ani14040588), 2024-02-10
Supplement: s1 [file s1]

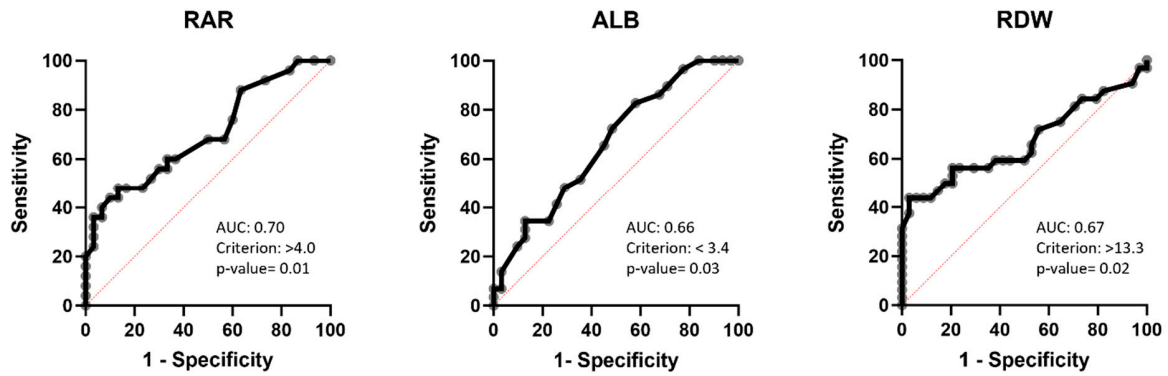

**Figure S1: RAR is of acceptable diagnostic utility in distinguishing PRAD from P-TCC.** Using an RAR cut-off value of >4.0 distinguishes PRAD from P-TCC using the (0,1) criterion, while a cut-off value of >4.850 is suggested when using the highest Youden index (0.35) for the ROC curve.

| Variable                          | AR+ (n=9)            | AR- (n=21)           | Ref. Int.   | p-value |
|-----------------------------------|----------------------|----------------------|-------------|---------|
| RBC ( $\times 10^6/\mu\text{L}$ ) | 6.0 (3.8-7.4)        | 6.1 (3.0-7.6)        | 5.6–8.0     | n.s.    |
| HGB (g/dL)                        | 14.3 (9.6-18.0)      | 14.2 (6.9-19.5)      | 14–19       | n.s.    |
| HCT (%)                           | 41.8 (25.4-50.7)     | 41.2 (21.4-52.5)     | 40–55       | n.s.    |
| MCV (fL)                          | 67.7 (61.7-75.6)     | 69.0 (59.9-75.0)     | 65–75       | n.s.    |
| MCH (pg)                          | 23.7 (21.5-26.5)     | 23.8 (20.4-28.7)     | 22–26       | n.s.    |
| MCHC (g/dL)                       | 34.7 (32.4-38.2)     | 34.6 (32.2-38.3)     | 33–36       | n.s.    |
| RDW (%)                           | 12.9 (11.8-19.7)     | 14.2 (11.30-18.7)    | 11–14       | n.s.    |
| RETIC (/μL)                       | 0 (0-155,400)        | 0 (0-154,700)        | 7000–65,000 | n.s.    |
| nRBC (/100 WBC)                   | 0 (0-0)              | 0 (0-3)              | RARE        | n.s.    |
| WBC (/μL)                         | 10,900 (6610-22,230) | 16,500 (7970-34,772) | 6000–13,000 | n.s.    |
| Neutrophils (/μL)                 | 9156 (4158-18,509)   | 12,098 (5252-31,295) | 3000–10,500 | n.s.    |
| Immature Neutrophils (/μL)        | 0 (0-446)            | 0 (0-2576)           | RARE        | n.s.    |
| Lymphocytes (/μL)                 | 1109 (503-2230)      | 975 (409-7523)       | 1000–40,000 | n.s.    |
| Monocytes (/μL) *                 | 637 (258-1247)       | 1082 (409-3492)      | 150–1200    | 0.02    |
| Eosinophils (/μL)                 | 218 (101-483)        | 231 (0-959)          | 0–1500      | n.s.    |
| Basophils (/μL)                   | 1 (0-101)            | 5 (0-898)            | 0–50        | n.s.    |

|                                   |               |                |          |      |
|-----------------------------------|---------------|----------------|----------|------|
| PLT ( $\times 10^3/\mu\text{L}$ ) | 266 (163-546) | 272 (19-717)   | 150–400  | n.s. |
| MPV (fL)                          | 10 (8.2-13.0) | 9.9 (7.0-17.6) | 7.0–13.0 | n.s. |
| TP (g/dL)                         | 6.7 (6.2-8.9) | 7.1 (6.1-8.3)  | 6.0–8.0  | n.s. |

**Table S1: Complete blood cell count findings for AR+ and AR- PRAD tumors.** There were no significant differences in CBC parameters between the groups apart from slightly higher circulating monocytes in AR-group ( $p=0.02$ ).

| Variable                       | AR+ (n=8)      | AR- (n=20)      | Ref. Int. | p-value |
|--------------------------------|----------------|-----------------|-----------|---------|
| Anion Gap (mmol/L)             | 21 (13-36)     | 20 (13-34)      | 12–20     | n.s.    |
| Sodium (mmol/L)                | 146 (142-152)  | 146 (138-153)   | 143–151   | n.s.    |
| Potassium (mmol/L)             | 4.2 (3.8-6.3)  | 4.4 (2.8-6.7)   | 3.6–4.8   | n.s.    |
| Chloride (mmol/L)              | 111 (103-115)  | 112 (89-126)    | 108–116   | n.s.    |
| Total CO <sub>2</sub> (mmol/L) | 19 (11-22)     | 19 (11-29)      | 20–29     | n.s.    |
| Phosphorus (mg/dL)             | 6.3 (5.7-12.8) | 4.5 (2.4-14.0)  | 2.6–5.2   | n.s.    |
| Calcium (mg/dL)                | 9.9 (8.3-12.4) | 10.3 (8.5-11.6) | 9.6–11.2  | n.s.    |
| BUN (mg/dL)                    | 9 (6-152)      | 22 (6-93)       | 11–33     | n.s.    |
| Creatinine (mg/dL)             | 0.9 (0.5-11.1) | 1.1 (0.5-4.6)   | 0.8–1.5   | n.s.    |
| Glucose (mg/dL)                | 104.5 (86-131) | 103 (18-170)    | 86–118    | n.s.    |
| Total protein (g/dL)           | 5.95 (4.9-7.6) | 6.3 (5.5-7.5)   | 5.4–6.9   | n.s.    |
| Albumin (g/dL)                 | 3.1 (1.8-3.9)  | 3.3 (1.7-4.0)   | 3.4–4.3   | n.s.    |
| Globulins (g/dL)               | 3.4 (2.1-4.4)  | 3.0 (2.2-5.2)   | 1.7–3.1   | n.s.    |
| ALT (U/L)                      | 41 (19-62)     | 43 (21-362)     | 21–72     | n.s.    |
| AST (U/L) *                    | 24 (15-33)     | 38 (19-288)     | 20–49     | 0.01    |
| CK (U/L)                       | 137 (76-152)   | 293 (119-873)   | 55–257    | n.s.    |
| ALP (U/L)                      | 83 (16-365)    | 112 (17-1395)   | 14–91     | n.s.    |
| GGT (U/L)                      | 4 (0-9)        | 5 (0-20)        | 0–5       | n.s.    |
| Cholesterol (mg/dL)            | 254 (163-336)  | 246 (117-398)   | 139–353   | n.s.    |
| Total Bilirubin (mg/dL)        | 0.2 (0.0-0.3)  | 0.1 (0.0-22.1)  | 0.0–0.2   | n.s.    |
| Magnesium (mg/dL)              | 2.7 (2.1-3.2)  | 2.1 (1.7-2.3)   | 1.9–2.5   | n.s.    |

**Table S2: Serum biochemistry findings for AR+ and AR- PRAD tumors.** There were no significant differences in biochemistry parameters between the groups apart from a higher AST in AR- group ( $p=0.01$ ).

| Variable                 | AR+ (n=7)           | AR- (n=17)          | Ref. Int.   | p-value |
|--------------------------|---------------------|---------------------|-------------|---------|
| pH                       | 6.0 (5.0-8.5)       | 7.0 (5.0-8.5)       | 5.0–9.0     | n.s.    |
| USG                      | 1.020 (1.010-1.041) | 1.027 (1.011-1.049) | 1.001–1.060 | n.s.    |
| Protein (mg/dL)          | 25 (0-500)          | 150 (0-500)         | NEG         | n.s.    |
| Bilirubin (mg/dL)        | 1 (0-1)             | 1 (0-6)             | NEG         | n.s.    |
| Hemoprotein<br>(ery./μL) | 250 (150-250)       | 250 (0-350)         | NEG         | n.s.    |
| WBC (/HPF)               | 5 (1-100)           | 7 (0-500)           | 0-3         | n.s.    |
| RBC (/HPF)               | 38 (10-100)         | 70 (0-250)          | 0-2         | n.s.    |

**Table S3: Quantitative urinalysis findings for AR+ and AR- PRAD tumors.** There were no significant differences in urinalysis quantitative parameters between the groups.

| Interpretation   | AR+ (n=7) | AR- (n=17) | Ref. Int.           | p-value |
|------------------|-----------|------------|---------------------|---------|
| Alkaluria        | 2 (29%)   | 3 (18%)    | pH > 7.5            | n.s.    |
| Aciduria         | 1 (14%)   | 1 (6%)     | pH < 6.0            | n.s.    |
| Adequate USG     | 6 (86%)   | 16 (94%)   | 1.014 < USG < 1.030 | n.s.    |
| Isosthenuria     | 1 (14%)   | 1 (6%)     | USG 1.007–1.013     | n.s.    |
| Hyposthenuria    | 0 (0%)    | 0 (0%)     | USG < 1.007         | n.s.    |
| Proteinuria      | 3 (43%)   | 11 (65%)   | >75 mg/dL           | n.s.    |
| Bilirubinuria    | 5 (71%)   | 9 (53%)    | >0 mg/dL            | n.s.    |
| Hematuria        | 7 (100%)  | 13 (76%)   | >2 RBC/HPF          | n.s.    |
| Pyuria           | 4 (57%)   | 10 (59%)   | >3 WBC/HPF          | n.s.    |
| Crystalluria     | 1 (14%)   | 9 (53%)    | NONE                | n.s.    |
| Casts            | 2 (29%)   | 6 (35%)    | NONE                | n.s.    |
| Epithelial cells | 4 (57%)   | 9 (53%)    | NONE                | n.s.    |
| Bacteriuria      | 2 (29%)   | 2 (12%)    | NONE                | n.s.    |

**Table S4: Urinalysis interpretations and associations for AR+ and AR- PRAD tumors.** There were no significant associations between urinalysis interpretation and AR status of PRAD tumors.

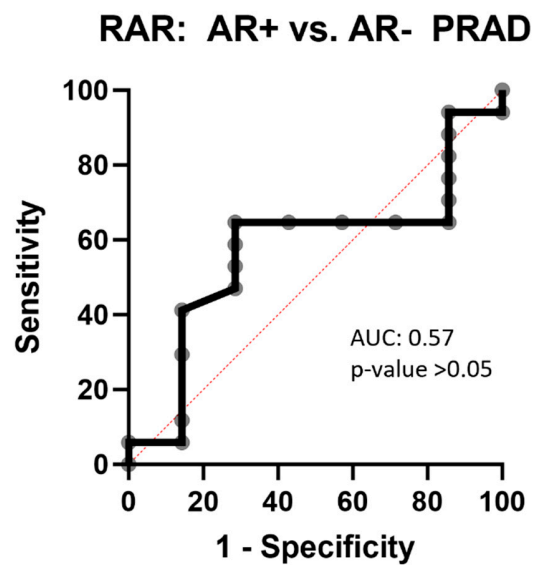

Figure S2: RAR is not significant in distinguishing AR+ from AR- PRAD.

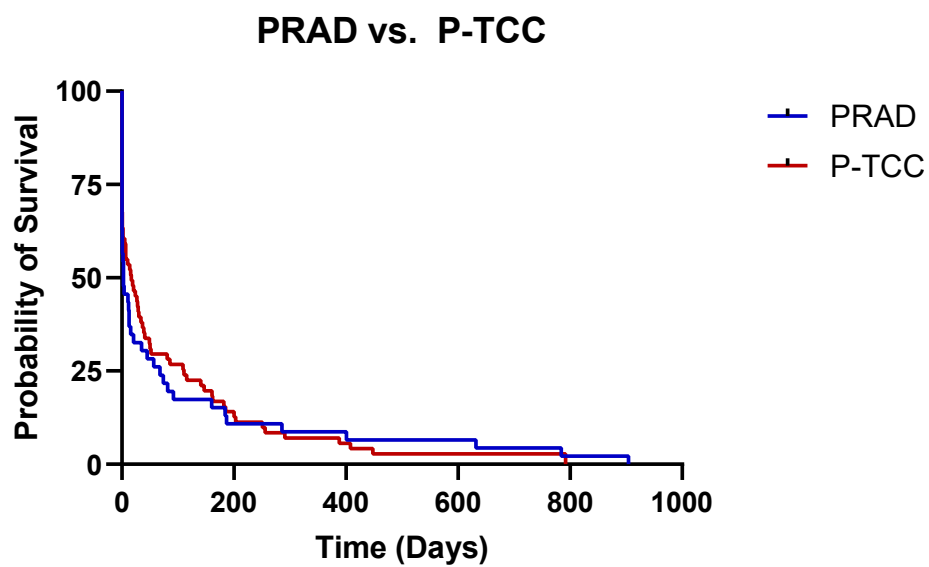

Figure S3: Survival times do not significantly differ between PRAD and P-TCC.

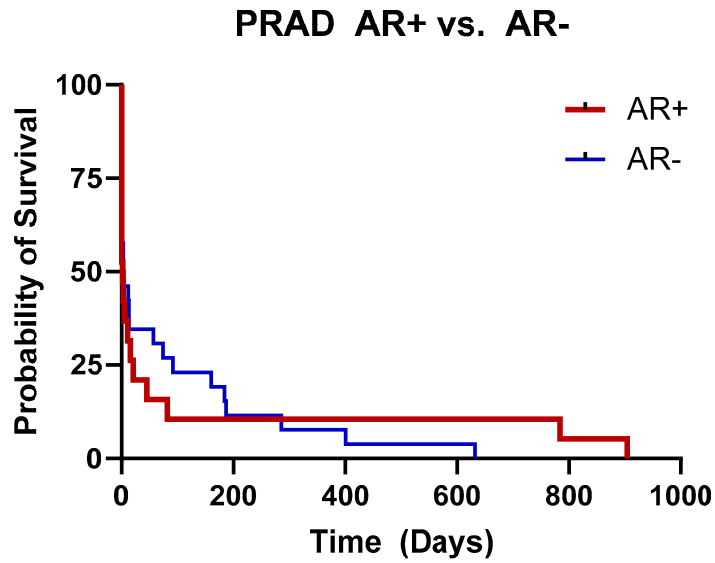

Figure S4: Survival times do not significantly differ between AR+ and AR- PRAD tumors.

| Survival Time | PRAD (n=48) | P-TCC (n=67) |
|---------------|-------------|--------------|
| 0 Days        | 18/48 (38%) | 25/67 (37%)  |
| 1-30 Days     | 15/48 (31%) | 15/67 (22%)  |
| 31-60 Days    | 3/48 (6%)   | 7/67 (10%)   |
| 61-90 Days    | 3/48 (6%)   | 2/67 (3%)    |
| 91-180 Days   | 3/48 (6%)   | 7/67 (10%)   |
| 181-365 Days  | 3/48 (6%)   | 7/67 (10%)   |
| >1 Year       | 2/48 (4%)   | 3/67 (5%)    |
| >2 Years      | 1/48 (2%)   | 1/67 (2%)    |
| >3 Years      | 0/48 (0%)   | 0/67 (0%)    |

**Table S5: Ranges of survival times in PRAD and P-TCC dogs.** Many animals were euthanized the same day as diagnosis.

| PCa Type | Variable          | Hazard Ratio (95% CI)                  | p-value |
|----------|-------------------|----------------------------------------|---------|
| PRAD     | RAR (High, >4.11) | 0.49 (0.06-2.95)                       | 0.46    |
|          | RDW (High, >14)   | 0.714 (0.11-5.76)                      | 0.73    |
|          | ALB (Low, < 3.4)  | 11.79 (1.99-102.93)                    | 0.01    |
| P-TCC    | RAR (High, >4.11) | 1.00 (Undetermined)                    | >0.99   |
|          | RDW (High, >14)   | 7.9 x 10 <sup>-13</sup> (Undetermined) | >0.99   |
|          | ALB (Low, < 3.4)  | 1.00 (Undetermined)                    | >0.99   |

**Table S6: Multivariate survival analysis of 13 PRAD and 20 P-TCC dogs surviving >1 day.**
